# Supplementary material for: Metal-free click approach for facile production of main chain poly(bile acid)s
Source: Royal Society of Chemistry journal article supplement (doi:10.1039/c3py00180f), 2013-01-01
Supplement: c3py00180f.pdf [file c3py00180f.pdf]

Electronic Supplementary Information (ESI) for

## Metal-free click approach for facilely producing main chain poly(bile acid)s

Weina Li,<sup>‡,a,b</sup> Tian Tian,<sup>‡,a</sup> Wei Zhu,<sup>a</sup> Jiecheng Cui,<sup>a</sup> Yong Ju,<sup>\*,b</sup> and Guangtao Li<sup>\*,a</sup>

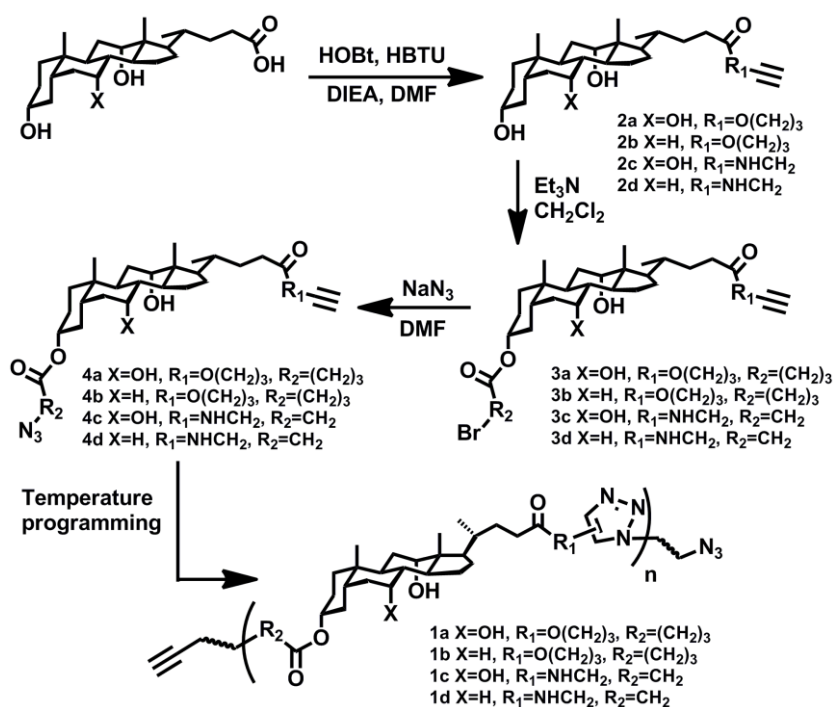

Scheme S1 Reaction scheme for the synthesis of main chain poly(bile acid)s 1a-1d.

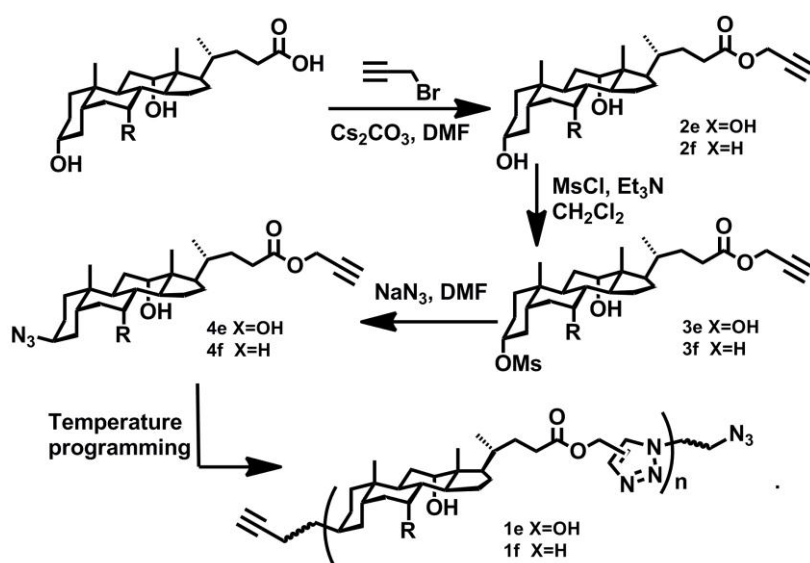

Scheme S2 Reaction scheme for the synthesis of main chain poly(bile acid)s 1e-1f.

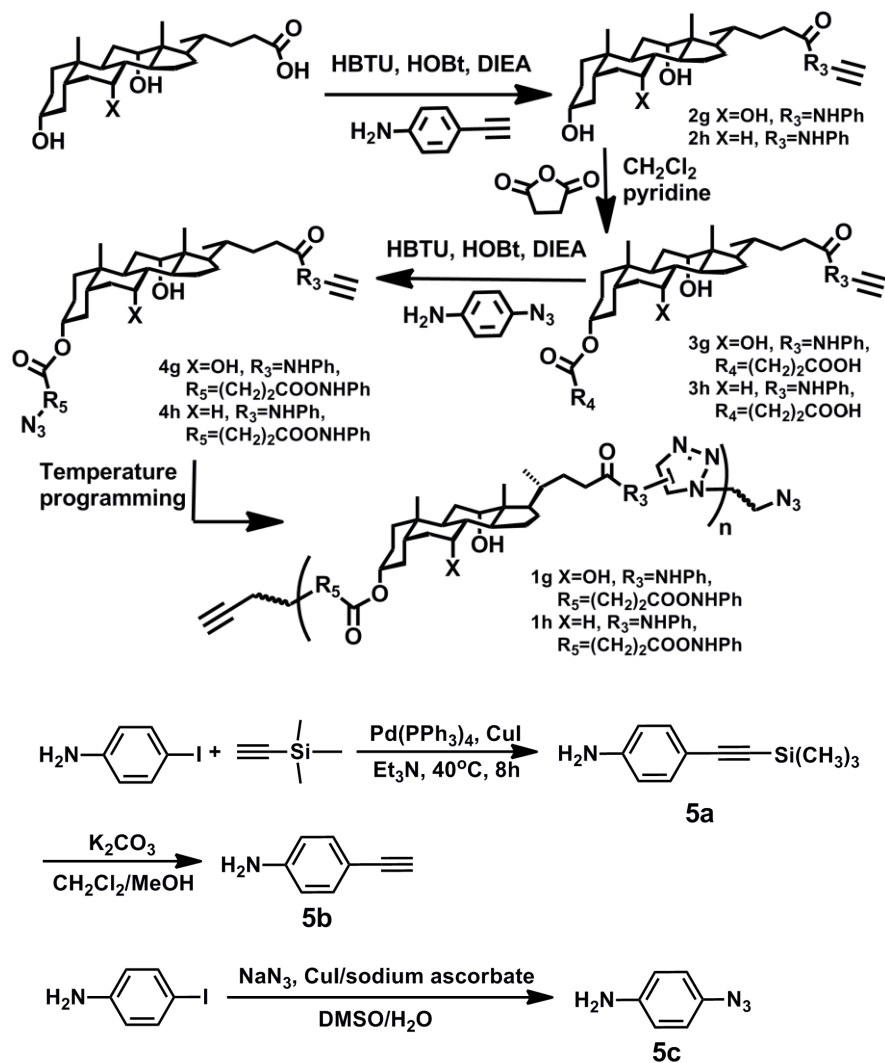

**Scheme S3** Reaction scheme for the synthesis of main chain poly(bile acid)s **1g-1h** and the phenyl azide and phenyl alkyne **5a-5c**.

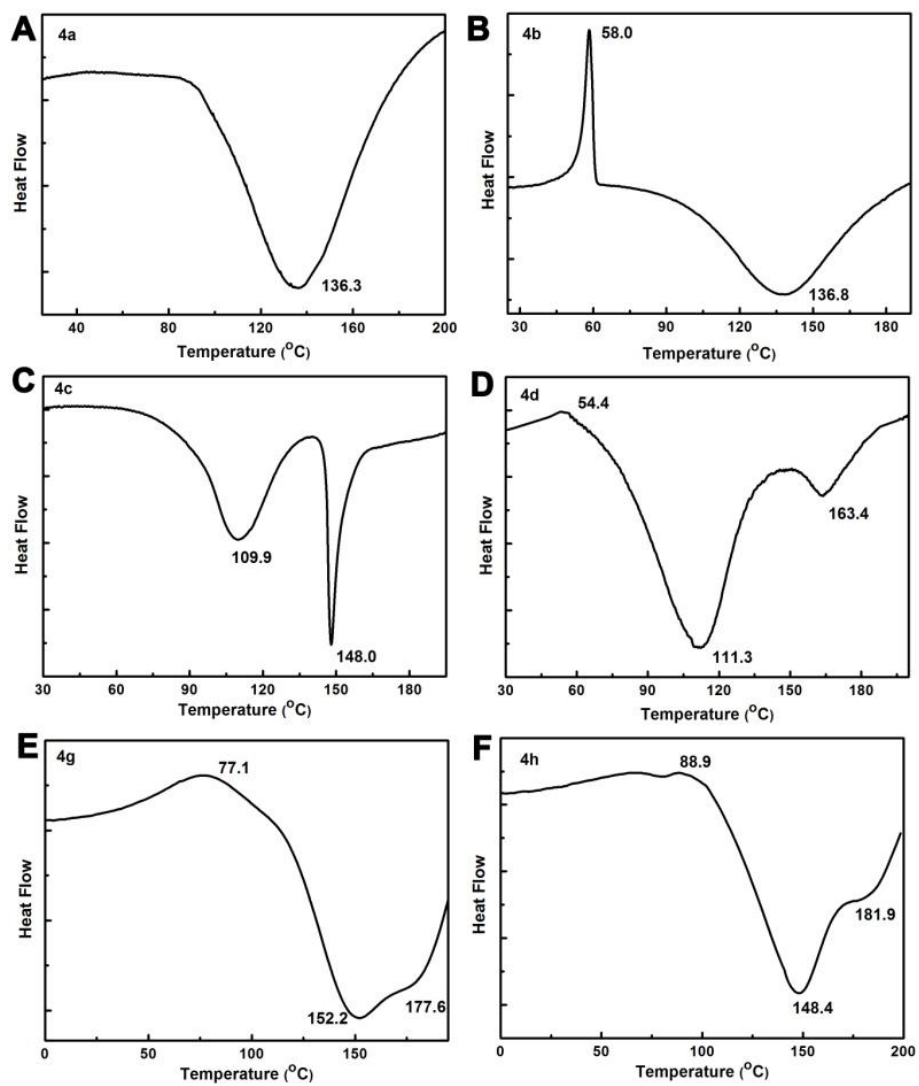

**Figure S1** DSC thermalgrams of the bile acid derivatives **4a** (A), **4b** (B), **4c** (C), **4d** (D), **4g** (E) and **4h** (F) recorded under N<sub>2</sub> atmosphere at a heating rate of 1°C min<sup>-1</sup>.

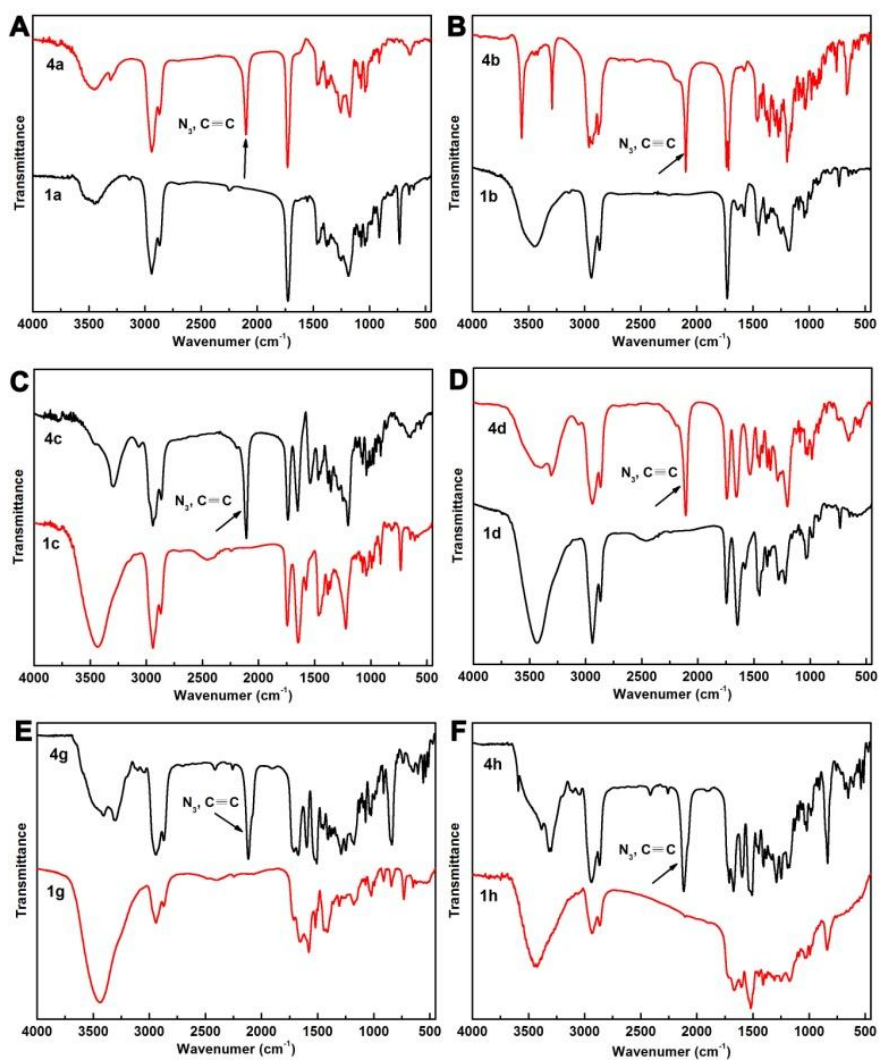

**Figure S2** FTIR spectra of the bile acid monomers their corresponding polymers **4a** and **1a** (A), **4b** and **1b** (B), **4c** and **1c** (C), **4d** and **1d** (D), **4g** and **1g** (E) and **4h** and **1h** (F).

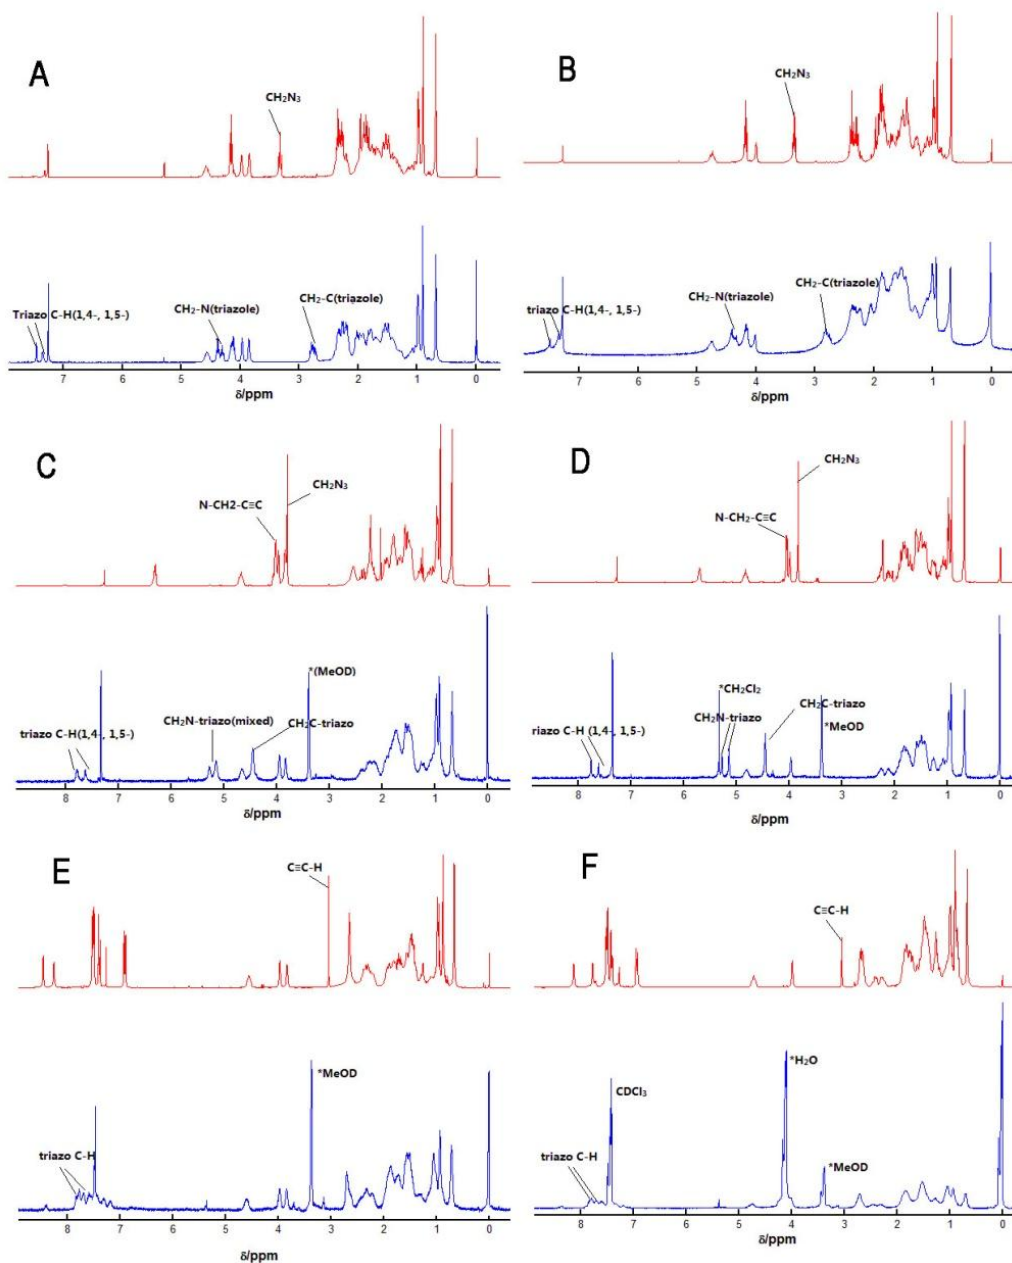

**Figure S3**  $^1\text{H}$  NMR spectra of bile acid monomers and the corresponding polymers **4a** and **1a** (A), **4b** and **1b** (B), **4c** and **1c** (C), **4d** and **1d** (D), **4g** and **1g** (E) and **4h** and **1h** (F).

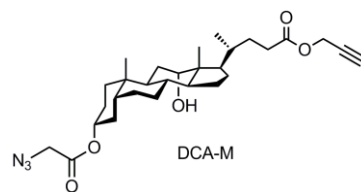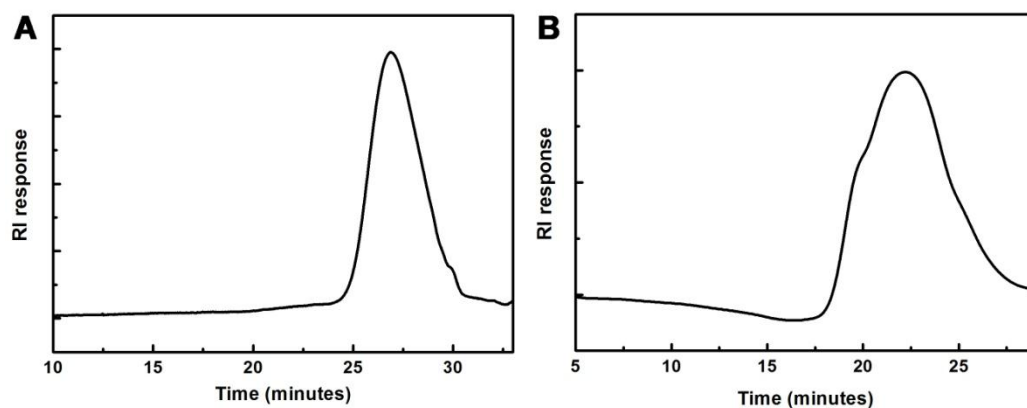

Figure S4 GPC spectra of DCA-P as synthesized from amorphous (A) and crystal state (B) monomers.

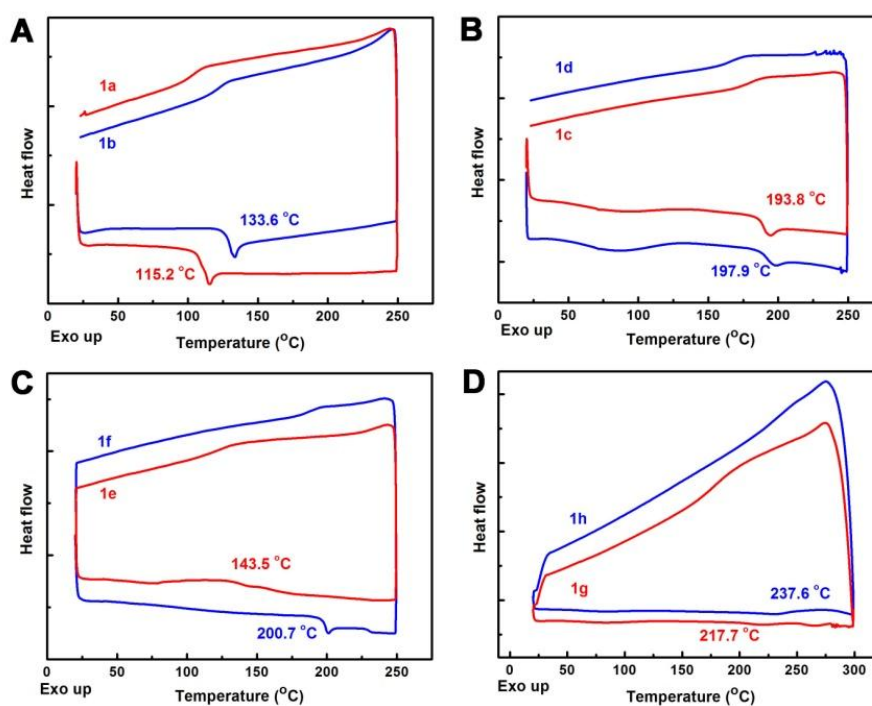

Figure S5 DSC heating and cooling curves of poly(bile acids) **1a** and **1b** (A), **1c** and **1d** (B), **1e** and **1f** (C), **1g** and **1h** (D).

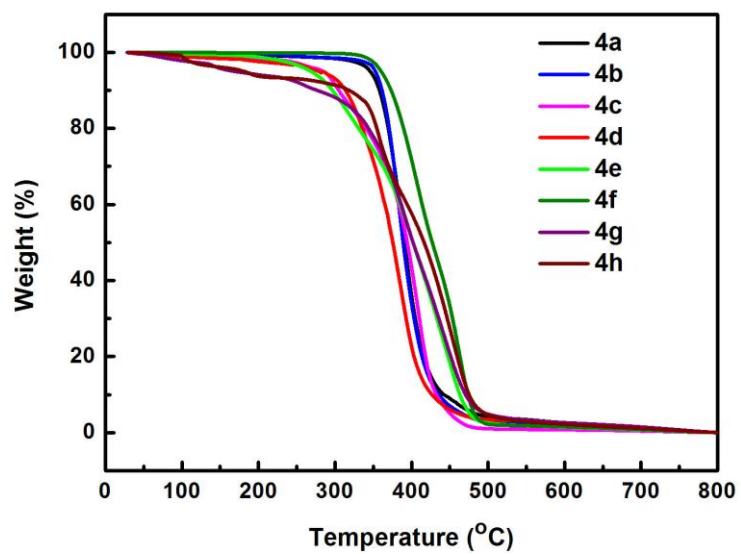

**Figure S6** TGA thermograms of **4a-4h** recorded under nitrogen at a heating rate of  $10\text{ }^{\circ}\text{C min}^{-1}$ .
